# Supplementary material
Source: Frontiers journal article supplement (https://www.frontiersin.org/articles/355917)
Supplement: Presentation_3.PDF [file Presentation_3.PDF]

### Supplementary Figure S3

**Venn diagram analysis of the finally identified DEPs in latex after Eth, Mo and EMO treatments**

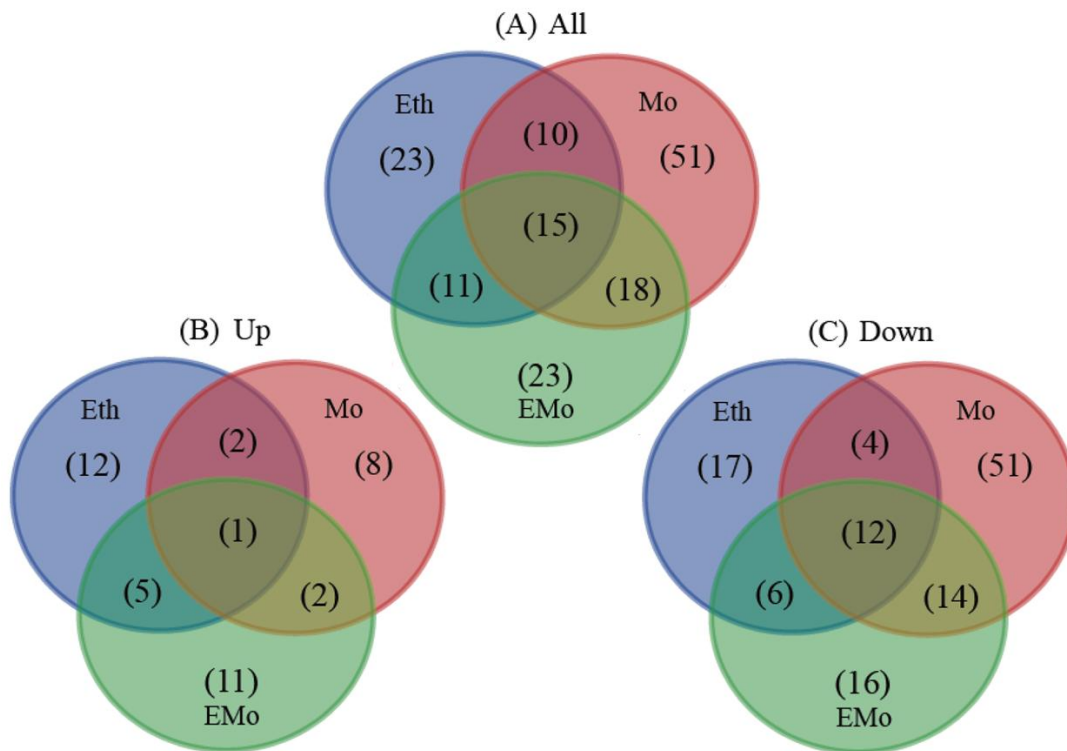

All of the identified 169 DEPs from the latex treated with Eth, Mo and EMO were performed venn diagram analysis (A). Then, the up (B) and down (C) regulated proteins were classified to show their changed patterns after different treatments.
